# Supplementary material
Source: PubMed Central journal article supplement (PMC3909708)
Supplement: NIHMS530986-supplement-01.pdf [file NIHMS530986-supplement-01.pdf]

Supplementary Figures

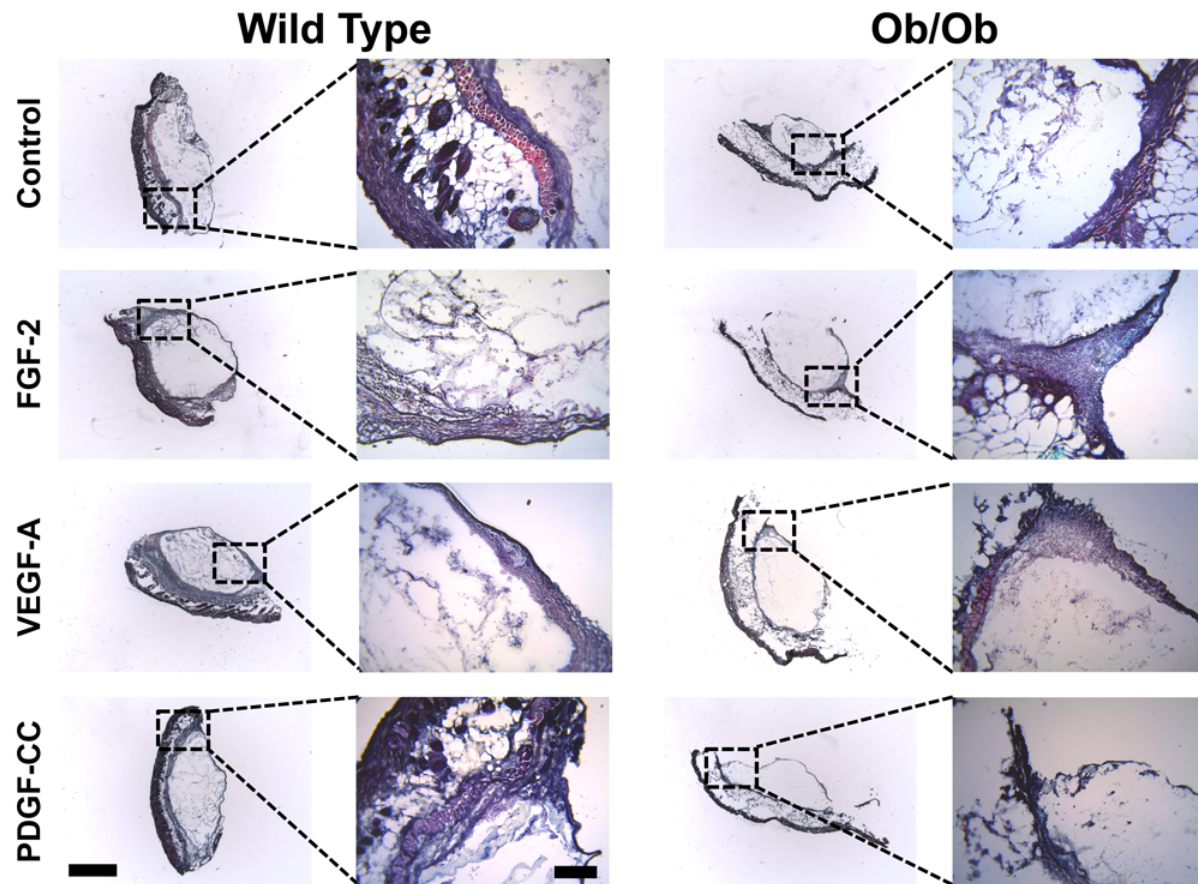

**Supplementary Figure S1.** Movat's Pentachrome staining of the sections of subcutaneously implanted alginate gels with growth factors. Alginate gels containing PBS, FGF-2, VEGF-A and PDGF-CC were subcutaneously implanted on the back of mice. The gels were harvested after seven days frozen, sectioned and stained as shown here. Size bar = 1mm. Mag. size bar = 250µm.

1  
2  
3  
4  
5  
6  
7  
8  
9  
10  
11  
12  
13  
14  
15  
16  
17  
18  
19  
20  
21  
22  
23  
24  
25  
26  
27  
28  
29  
30  
31  
32  
33  
34  
35  
36  
37  
38  
39  
40  
41  
42  
43  
44  
45  
46  
47  
48  
49  
50  
51  
52  
53  
54  
55  
56  
57  
58  
59  
60  
61  
62  
63  
64  
65

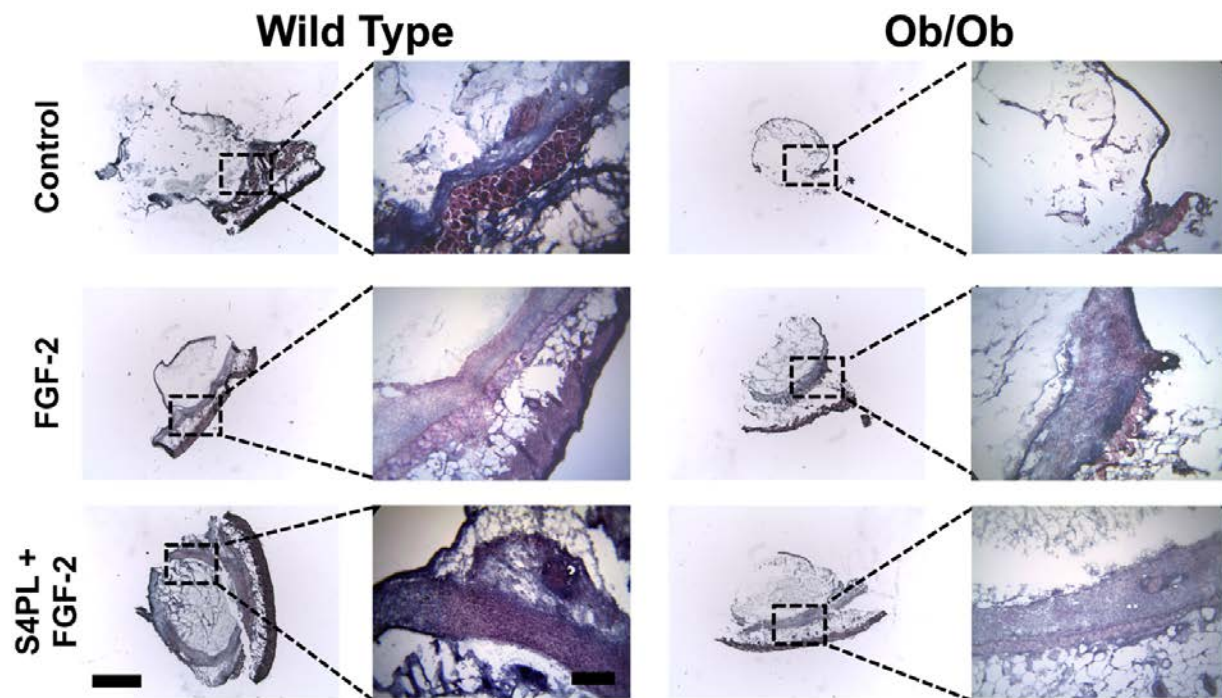

**Supplementary Figure S2.** Movat's Pentachrome staining of the sections of subcutaneously implanted alginate gels with PBS, FGF-2 and syndecan-4 proteoliposomes with FGF-2. The gels were harvested after seven days frozen, sectioned and stained as shown here. Size bar = 1mm. Mag. size bar = 250µm.

1  
2  
3  
4 **Supplementary Tables**  
5  
6  
7  
8  
9  
10  
11  
12  
13  
14

15 **Supplementary Table S1. Summary of Gene Expression**  
16 *Relative to WT mice with Normal Diet*  
17  
18

| Tissue          | Heart     |           |           | Muscle      |            |             |
|-----------------|-----------|-----------|-----------|-------------|------------|-------------|
|                 | WT        | Ob/Ob     | Ob/Ob     | WT          | Ob/Ob      | Ob/Ob       |
|                 | HFD       | NCD       | HFD       | HFD         | NCD        | HFD         |
| Syn-1           | ND        | +         | <b>+</b>  | ND          | +          | <b>+++</b>  |
| Syn-2           | ND        | +         | <b>+</b>  | ---         | -          | +           |
| Syn-4           | -         | +         | +         | +           | ND         | <b>+++</b>  |
| PDGFR- $\alpha$ | <b>+</b>  | +         | ---       | --          | -          | ND          |
| PDGFR- $\beta$  | ND        | +         | +         | ND          | -          | +           |
| FGFR-1          | ND        | ND        | +         | --          | <b>+++</b> | <b>++++</b> |
| VEGFR-2         | -         | +         | <b>+</b>  | +           | ND         | <b>++</b>   |
| NRP-1           | <b>++</b> | <b>++</b> | <b>++</b> | <b>+++</b>  | <b>++</b>  | <b>++++</b> |
| HPA             | -         | +         | ND        | <b>++++</b> | <b>+++</b> | +           |

19  
20  
21  
22  
23  
24  
25  
26  
27  
28  
29  
30  
31  
32  
33  
34  
35  
36  
37  
38  
39  
40  
41 **Labels:** HFD = High Fat Diet, NCD = Normal Chow Diet, ND = No difference,  
42 + = 1.5-3 fold more, ++ = 3-5 fold more, +++ = 5-10 fold more, ++++ = 10+ fold more  
43 - = 1.5-3 fold less, -- = 3+ fold less, --- = 5-10 fold less, ---- = 10+ fold less  
44 **Bold** = Statistically significant difference  
45  
46  
47  
48  
49  
50  
51  
52  
53  
54  
55  
56  
57  
58  
59  
60  
61  
62  
63  
64  
65

1  
2  
3  
4  
5  
6  
7  
8  
9  
10  
11  
12  
13  
14  
15  
16  
17  
18  
19  
20  
21  
22  
23  
24  
25  
26  
27  
28  
29  
30  
31  
32  
33  
34  
35  
36  
37  
38  
39  
40  
41  
42  
43  
44  
45  
46  
47  
48  
49  
50  
51  
52  
53  
54  
55  
56  
57  
58  
59  
60  
61  
62  
63  
64  
65

**Supplementary Table S2. Summary of Protein Expression Relative to WT mice with Normal Diet**

| Tissue                             | Heart      |          |       | Muscle     |           |       |
|------------------------------------|------------|----------|-------|------------|-----------|-------|
|                                    | WT         | Ob/Ob    | Ob/Ob | WT         | Ob/Ob     | Ob/Ob |
|                                    | HFD        | NCD      | HFD   | HFD        | NCD       | HFD   |
| Syn-1                              | <b>++</b>  | ND       | ND    | <b>+</b>   | ND        | ND    |
| Syn-2                              | <b>+</b>   | -        | -     | <b>+</b>   | -         | -     |
| Syn-4                              | <b>+</b>   | ND       | ND    | <b>+</b>   | ND        | -     |
| PDGFR- $\alpha$                    | <b>+</b>   | ND       | ND    | <b>++</b>  | -         | --    |
| p-PDGFR- $\alpha$ /PDGFR- $\alpha$ | ND         | ND       | ND    | -          | <b>++</b> | -     |
| PDGFR- $\beta$                     | <b>+</b>   | ND       | ND    | ND         | <b>+</b>  | -     |
| FGFR-1                             | <b>+</b>   | ND       | ND    | ND         | ND        | -     |
| VEGFR-2                            | ND         | -        | --    | ND         | ND        | -     |
| NRP-1                              | ND         | ND       | -     | ND         | --        | ---   |
| HPA                                | <b>+++</b> | <b>+</b> | ND    | <b>+++</b> | -         | ---   |

**Labels:** HFD = High Fat Diet, NCD = Normal Chow Diet, ND = No difference,  
 + = 1.5-3 fold more, ++ = 3-5 fold more, +++ = 5-10 fold more, ++++ = 10+ fold more  
 - = 1.5-3 fold less, -- = 3+ fold less, --- = 5-10 fold less, ---- = 10+ fold less

**Bold** = Statistically significant difference

1  
2  
3  
4  
5  
6  
7  
8  
9  
10  
11  
12  
13  
14  
15  
16  
17  
18  
19  
20  
21  
22  
23  
24  
25  
26  
27  
28  
29  
30  
31  
32  
33  
34  
35  
36  
37  
38  
39  
40  
41  
42  
43  
44  
45  
46  
47  
48  
49  
50  
51  
52  
53  
54  
55  
56  
57  
58  
59  
60  
61  
62  
63  
64  
65

**Supplementary Table S3. Primers used for real time qPCR**

| <b>Gene</b>     | <b>Forward Primer</b> | <b>Reverse Primer</b> |
|-----------------|-----------------------|-----------------------|
| FGFR-1          | ACCAAGAAGAGCGACTTCCA  | AACCAGGAGAACCCCAGAGT  |
| VEGFR-2         | TTTGGTTTTGGAAGGTTTGC  | AGGAGCAAGCTGCATCATTT  |
| PDGFR- $\alpha$ | ACCACAATGGTGCTGTTGAA  | AATCTCTGGGGCAAAGGTCT  |
| PDGFR- $\beta$  | CCGGAACAAACACACCTTCT  | TATCCATGTAGCCACCGTCA  |
| Syndecan-1      | AGCCTTCCTCCCTCATGTTT  | TCTAGCTGAGTGGCTGAGCA  |
| Syndecan-2      | ACATCTCCCCTTGCTGTGAC  | TGAGGGTTCTTTGGTCTTG   |
| Syndecan-4      | CTGATCCTGCTGCTGGTGTA  | GGAGGAAGCTTCATGCGTAG  |
| Neuropilin-1    | GGAGCTACTGGGCTGTGAAG  | CCTCCTGTGAGCTGGAAGTC  |
| Heparanase      | GGAGCAGGCAACTACCACTT  | ACAGGAGCAAACCTCCGAGTG |
| GAPDH           | AACTTTGGCATTGTGGAAGG  | GGATGCAGGGATGATGTTCT  |

Abbreviations used were as follows: FGFR-1 = Fibroblast Growth Factor-1; VEGFR-2 = Vascular Endothelial Growth Factor; PDGFR- $\alpha$  = Platelet Derived Growth Factor Alpha; PDGFR- $\beta$  = Platelet Derived Growth Factor Beta; GAPDH = Glyceraldehyde 3-Phosphate Dehydrogenase.

1  
2  
3  
4  
5  
6  
7  
8  
9  
10  
11  
12  
13  
14  
15  
16  
17  
18  
19  
20  
21  
22  
23  
24  
25  
26  
27  
28  
29  
30  
31  
32  
33  
34  
35  
36  
37  
38  
39  
40  
41  
42  
43  
44  
45  
46  
47  
48  
49  
50  
51  
52  
53  
54  
55  
56  
57  
58  
59  
60  
61  
62  
63  
64  
65

**Supplementary Table S4. Antibodies used in the studies**

| <b>Protein/Label</b> | <b>Antibody</b>   | <b>Company</b> | <b>Type</b> |
|----------------------|-------------------|----------------|-------------|
| GAPDH                | Mouse monoclonal  | Santa Cruz     | Primary     |
| Syndecan-1           | Mouse monoclonal  | ABCAM          | Primary     |
| Syndecan-2           | Rabbit polyclonal | ABCAM          | Primary     |
| Syndecan-4           | Rabbit polyclonal | ABCAM          | Primary     |
| Neuropilin-1         | Rabbit monoclonal | ABCAM          | Primary     |
| Heparanase           | Mouse monoclonal  | Cell Sciences  | Primary     |
| PDGFR- $\alpha$      | Rabbit polyclonal | ABCAM          | Primary     |
| pPDGFR- $\alpha$     | Rabbit monoclonal | Cell Signaling | Primary     |
| PDGFR- $\beta$       | Rabbit monoclonal | Cell Signaling | Primary     |
| FGFR-1               | Rabbit polyclonal | ABCAM          | Primary     |
| PECAM                | Goat polyclonal   | Santa Cruz     | Primary     |
| VEGFR2/KDR           | Rat monoclonal    | Santa Cruz     | Primary     |
| AlexaFluor 594       | Donkey polyclonal | Life Tech      | Secondary   |
| HRP                  | Donkey polyclonal | Santa Cruz     | Secondary   |
